# Supplementary material for: Facile synthesis of hybrid Cu2O/Pd–Fe3O4 nanocatalysts for C–H arylation of 4-nitroimidazoles
Source: Royal Society of Chemistry journal article supplement (doi:10.1039/c6ra05068a), 2016-01-01
Supplement: c6ra05068a1.pdf [file c6ra05068a1.pdf]

## Supporting Information

### Facile synthesis of hybrid $\text{Cu}_2\text{O}/\text{Pd-Fe}_3\text{O}_4$ nanocatalysts for C-H arylation of 4-nitroimidazoles

Hyunje Woo,<sup>a</sup> Junha Park,<sup>a</sup> Ji Chan Park,<sup>b</sup> Sungkyun Park,<sup>c</sup> Jae Myung Lee<sup>d</sup> and  
Kang Hyun Park<sup>a\*</sup>

<sup>a</sup> Department of Chemistry and Chemistry Institute for Functional Materials, Pusan National University, Busan 609-735, Korea.

Phone: (+82)-51-510-2238; Fax: (+82)-51-980-5200; e-mail: chemistry@pusan.ac.kr

<sup>b</sup> Clean Fuel Laboratory, Korea Institute of Energy Research, Daejeon, 305-343, Korea.

<sup>c</sup> Department of physics, Pusan National University, Busan 609-735, Korea.

<sup>d</sup> Department of Naval Architecture & Ocean Engineering, Pusan National University, Busan 609-735, Korea.

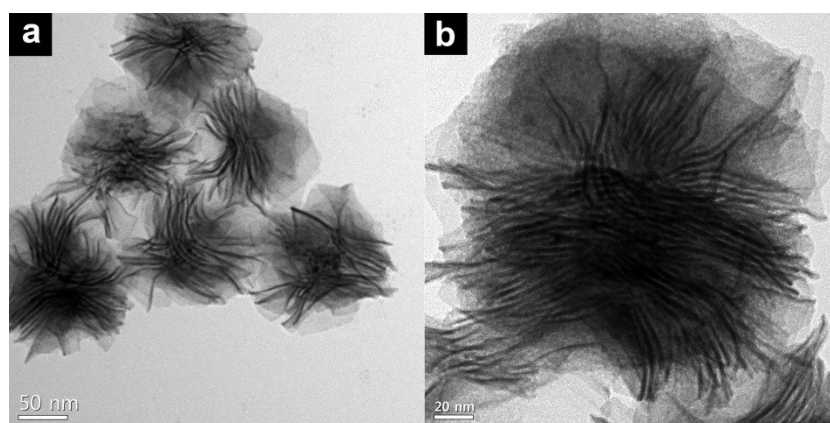

**Fig. S1** TEM images of the Pd-Fe<sub>3</sub>O<sub>4</sub> nanocomposites.

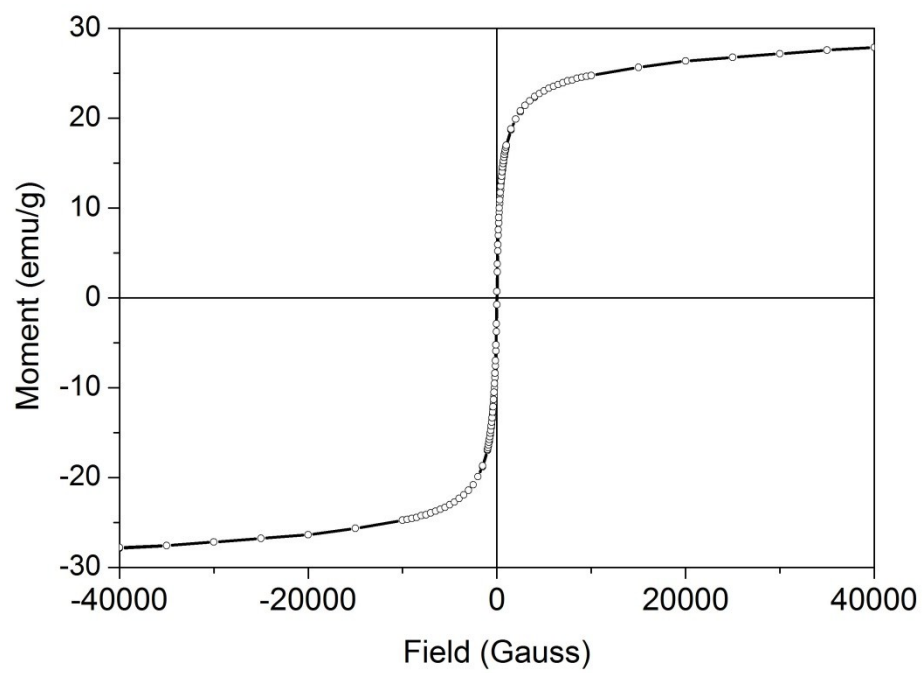

**Fig. S2** SQUID graph of Cu<sub>2</sub>O/Pd-Fe<sub>3</sub>O<sub>4</sub>.

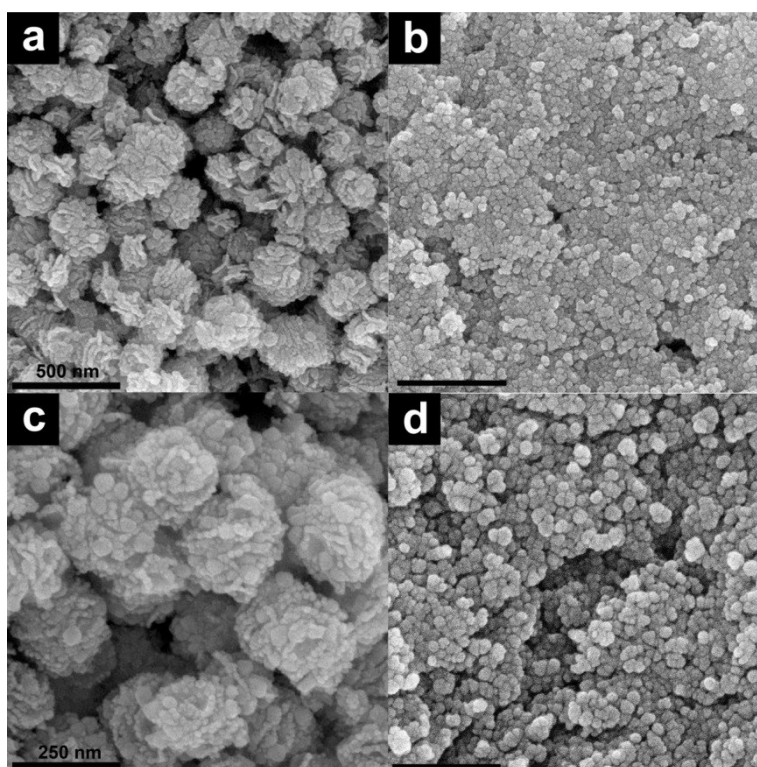

**Fig. S3** TEM images of the  $\text{Cu}_2\text{O}/\text{Pd}-\text{Fe}_3\text{O}_4$  nanocomposites synthesized at different amount of solvent. (OAm: 20 ml) (a,c) and (ODE: 20 ml) (b,d).
